# Supplementary material
Source: Research Square preprint supplement (doi:10.21203/rs.3.rs-9024043/v1)
Supplement: Supplementary file 1 [file 050603afaf2b1d877028fc1f.docx]

**Supplementary Document**

Table S1

Recognition of the Mental Illnesses and Their Treatment Modalities by Teachers, Students and Parents

| **Case vignette topic** | **Participants**  **Correctly Identified**  **(N=963)**  **n (%)** |
| --- | --- |
| Oppositional Defiant Disorder & Conduct Disorder | 339 (35.2) |
| Autism Spectrum Disorder & Intellectual Disability | 557 (57.8) |
| Major Depressive Disorder | 411 (42.7) |
| Anxiety Disorder | 405 (42.1) |
| Obsessive Compulsive Disorder | 346 (35.9) |
| Conversion Disorder | 278 (28.9) |
| Bipolar Mood Disorder | 367 (38.1) |
| Sexual Dysfunction (Male) | 433 (45.0) |
| Personality Disorder | 455 (47.2) |
| Schizophrenia | 410 (42.6) |
| Substance Use Disorder | 627 (65.1) |
| Dementia | 508 (52.8) |
| Pharmacological Interventions | 733 (76.1) |
| Psychosocial Interventions | 468 (48.6) |

**Note.** N = total sample; n = number correctly identified; percentages reflect proportion of total participants.
